# 1           **The Effects of Inter-Individual Biological Differences and Taphonomic** 2           **Alteration on Human Bone Protein Profiles: Implications for the** 3           **Development of PMI/AAD Estimation Methods**

4   Hayley L. Mickleburgh<sup>1,2</sup>, Ed Schwalbe<sup>3</sup>, Haruka Mizukami<sup>3</sup>, Federica Sellitto<sup>3</sup>, Sefora Starace<sup>4</sup>,  
5   Daniel J. Wescott<sup>2</sup>, David O. Carter<sup>5</sup>, Noemi Procopio<sup>3\*</sup>

6  
7   <sup>1</sup> *Department of Cultural Sciences, Linnaeus University, Kalmar, Sweden*

8  
9   <sup>2</sup> *Forensic Anthropology Center, Texas State University, San Marcos, Texas*

10  
11   <sup>3</sup> *The Forensic Science Unit, Faculty of Health and Life Sciences, Ellison Building, Northumbria*  
12   *University, Northumbria University Newcastle, Newcastle Upon Tyne, NE1 8ST, United*  
13   *Kingdom*

14  
15   <sup>4</sup> *Dipartimento di Chimica, University of Turin, Via P. Giuria 7, 10125 Turin, Italy*

16  
17   <sup>5</sup> *Forensic Sciences Unit, School of Natural Sciences and Mathematics, Chaminade University*  
18   *of Honolulu, Hawaii*

## 19 20 21   **Abstract**

22   Bone proteomics studies using animal proxies and skeletonized human remains have  
23   delivered encouraging results in the search for potential biomarkers for precise and accurate  
24   post-mortem interval (PMI) and the age-at-death (AAD) estimation in medico-legal  
25   investigations. At present, however, the effects of inter-individual biological differences and  
26   taphonomic alteration on recovered human bone protein profiles are not well understood.  
27   This study investigated the human bone proteome in four human body donors studied  
28   throughout decomposition outdoors. The effects of ageing phenomena (*in vivo* and post-  
29   mortem), and intrinsic and extrinsic variables on the variety and abundance of the bone  
30   proteome were assessed. Results identified a new potential biomarker for PMI estimation, as  
31   well as three potential biomarkers for AAD estimation. The results also suggest that bone  
32   mineral density (BMD) may be an important variable affecting the survival and extraction of  
33   proteins.

## 34 35   **Highlights**

- 36   - CO3, CO9, COBA2, CO3A1, MGP, PGS2 and TTHY are potential biomarkers for post-  
37   mortem interval estimation in skeletonized human remains
- 38   - FETUA, ALBU and OLFL3 are potential biomarkers for age-at-death estimation in human  
39   remains
- 40   - Taphonomic and biological variables play a significant role in survival and extraction rates  
41   of proteins in bone
- 42   - Bone mineral density may affect survival of proteins in bone, probably due to the effects  
43   of the mineral matrix on the movement of decomposer microbes
- 44   - Higher bone mineral density may affect the survival and the extraction rate of collagen  
45   and mineral-binding proteins

47 **Key words**

48 Forensic proteomics, forensic taphonomy, bone mineral density, post-mortem interval  
49 estimation, age-at-death estimation, decomposition, postmortem microbiology

50

51 **1. Introduction**

52 Estimations of the time elapsed since death (post-mortem interval, PMI) and the age-at-death  
53 (AAD) are crucial in the forensic investigation of unidentified human remains. This  
54 information is important to distinguish between historical remains (>100 years old) and  
55 remains of medico-legal relevance ( $\leq 100$  years old)<sup>1,2</sup>, and to narrow the search of missing  
56 persons for identification purposes<sup>3,4</sup>. High precision, accuracy and objectivity of PMI and AAD  
57 estimation methods are essential in order to be considered admissible in a court of law.

58 PMI estimation often relies on visual assessment of gross morphological changes of  
59 the body during decomposition<sup>5-7</sup>, even though the rate of these changes is known to be  
60 highly variable<sup>8,9</sup>. Accuracy of the PMI estimation decreases as decomposition progresses,  
61 and interobserver reliability differs depending on the method and the experience of the  
62 researcher<sup>9,10</sup>. Biochemical techniques have shown promising results in the search for a  
63 precise and accurate method to estimate late PMI in human bone, however, these methods  
64 are yet to be validated for use in forensic contexts<sup>11-14</sup>.

65 Standard AAD estimation methods are based on the examination of the morphological  
66 characteristics of the remains<sup>15</sup>, and require the evaluation of several different skeletal  
67 elements<sup>16</sup>. Different methods are applied to juveniles and adults<sup>17,18</sup>. Limitations of these  
68 methods include a high inter-observer variability<sup>15</sup>, inter- and intra-population variability with  
69 increasing AAD<sup>19</sup>, lack of consensus regarding the evaluation of the errors<sup>20</sup>, poor precision in  
70 adult aging in comparison with juvenile and adolescent aging<sup>4</sup>, and the requirement for  
71 remains to be as complete as possible<sup>20</sup>.

72 In recent years, bone proteomics methods have been demonstrated to be highly  
73 promising for the development of precise, accurate and objective PMI and AAD estimation  
74 methods, requiring only small samples of bone. Proteins are relatively stable in bone, and  
75 have been successfully extracted from archaeological<sup>21-25</sup> and paleontological specimens<sup>26-</sup>  
76 <sup>29</sup>, making them a promising target for forensic applications<sup>30</sup>. Studies conducted using animal  
77 models (e.g., *Sus scrofa* and *Bos bovid*) focused on inter- and intra-individual comparisons and  
78 monitored changes in the bone proteomes associated with progressing decomposition  
79 stages. These studies revealed inter-skeletal proteomic variability<sup>31</sup>, and identified potential  
80 biomarkers for AAD<sup>31</sup> and PMI estimations<sup>32</sup>. In addition, burial environment was found to  
81 affect the proteome recovered from archaeological specimens<sup>33</sup>. However, the development  
82 of bone proteomics methods for forensics remains impeded by the fact that it is unknown  
83 how representative animal models are for human specimens. Moreover, it is largely unknown  
84 how taphonomic processes and inter-individual variation (both *in vivo* and at the time of  
85 death), including underlying health conditions, affect the survival and extraction of bone  
86 protein profiles in humans.

87 A recent study conducted on human bones collected from a cemetery in Southeast  
88 Spain, provided promising new insights on the estimation of broad PMI ranges (5-20 years) in  
89 humans using protein biomarkers in proximal femoral bone<sup>34</sup>. The study identified 32 proteins  
90 which could be used in conjunction to discriminate between PMIs greater or smaller than 12  
91 years<sup>34</sup>. The sampled individuals were subjected to similar taphonomic conditions, and PMIs  
92 were greater than 7 years in all but one case. While the study was conducted on a relatively  
93 large sample (n=40), inter-individual and inter-skeletal comparison of bone protein profiles at

94 different stages of decomposition of the body were not possible as only one skeletal element  
 95 was available per individual. For the further development, and ultimately validation, of  
 96 forensic proteomics to estimate PMI, the study of changes in human bone protein profiles  
 97 from the fresh stage of decomposition to the skeletonized stage is crucial.

98 In this study, we aimed to investigate the effects of taphonomy and biological  
 99 variation on the recovery and variability of the human bone proteome, and evaluate potential  
 100 avenues to develop a broadly applicable, standardized method of PMI and AAD estimation in  
 101 human remains in advanced state of decomposition. The proteomes of anterior midshaft tibia  
 102 and iliac crest samples from four body donors of known AAD (two buried and two placed in  
 103 an open pit), taken shortly after death and upon complete skeletonization of the body, were  
 104 analysed to investigate 1) whether the previously identified potential biomarkers for PMI and  
 105 AAD are applicable to human bones with lower PMIs, 2) whether additional potential  
 106 biomarkers for PMI/AAD estimation could be identified, 3) whether the human bone  
 107 proteome is subject to inter-skeletal and inter-individual variability, and 4) the role  
 108 depositional environment, season and taphonomy play in bone proteome recovery.

109

## 110 2. Results

111

### 112 Proteomic data

113 The proteome of both the midshaft tibia and the iliac crest of four human body donors  
 114 sampled at “fresh” (PMI = 2-10 days) and at “skeletonized” (i.e., when bodies did not have  
 115 any adhering/desiccated soft tissue) stages of decomposition (PMI variable, between ~5200  
 116 and ~17800 ADD, depending on the season of placement, see Table 1), was analysed. Three  
 117 replicate extractions were taken from each bone, totaling 48 proteomic analyses. After  
 118 refining the Progenesis results based on the number of unique peptides and on the ion score  
 119 (see Methods section), 133 quantifiable proteins were identified (Supplementary Data 1). The  
 120 protein interaction network (Fig. 1) showed a significant enrichment of interactions (PPI  
 121 enrichment  $p < 1.0 \times 10^{-16}$ ) and functional enrichments of specific GO terms for biological  
 122 processes, cellular components and molecular functions (Supplementary Data 2).

123

124 **Table 1.** Biological and bone sample data.

| Donor | Age at death (years) | Sex | Sample ID   | Lab ID (three replicates) | Depositional context | Placement date (dd-mm-yy) | Collection date (dd-mm-yy) | T in days* |
|-------|----------------------|-----|-------------|---------------------------|----------------------|---------------------------|----------------------------|------------|
| 1     | 91                   | F   | B1A-2-iliac | NP1-2-3                   | Open pit             |                           | 28-04-2015                 | -1         |
| 1     | 91                   | F   | B1A-2-tibia | NP4-5-6                   | Open pit             | 28-04-2015                | 28-04-2015                 | -1         |
| 1     | 91                   | F   | B1C-2-iliac | NP7-8-9                   | Open pit             |                           | 03-12-2015                 | 219        |
| 1     | 91                   | F   | B1C-2-tibia | NP10-11-12                | Open pit             |                           | 03-12-2015                 | 219        |
| 2     | 67                   | F   | B2A-2-iliac | NP13-14-15                | Burial               |                           | 07-05-2015                 | 0          |
| 2     | 67                   | F   | B2A-2-tibia | NP16-17-18                | Burial               | 07-05-2015                | 07-05-2015                 | 0          |
| 2     | 67                   | F   | B2C-2-iliac | NP19-21-21                | Burial               |                           | 17-08-2017                 | 834        |
| 2     | 67                   | F   | B2C-2-tibia | NP22-23-24                | Burial               |                           | 17-08-2017                 | 834        |
| 3     | 61                   | F   | B3A-2-iliac | NP25-26-27                | Burial               | 24-06-2015                | 24-06-2015                 | 0          |
| 3     | 61                   | F   | B3A-2-tibia | NP28-29-30                | Burial               |                           | 24-06-2015                 | 0          |

|   |    |   |             |            |          |            |     |
|---|----|---|-------------|------------|----------|------------|-----|
| 3 | 61 | F | B3C-2-iliac | NP31-32-33 | Burial   | 21-08-2017 | 790 |
| 3 | 61 | F | B3C-2-tibia | NP34-35-36 | Burial   | 21-08-2017 | 790 |
| 4 | 77 | F | B4A-2-iliac | NP37-38-39 | Open pit | 19-10-2015 | -1  |
| 4 | 77 | F | B4A-2-tibia | NP40-41-42 | Open pit | 19-10-2015 | -1  |
| 4 | 77 | F | B4C-2-iliac | NP43-44-45 | Open pit | 19-10-2015 | 872 |
| 4 | 77 | F | B4C-2-tibia | NP46-47-48 | Open pit | 09-03-2018 | 872 |

125 \* T0 = day of burial/placement.

126

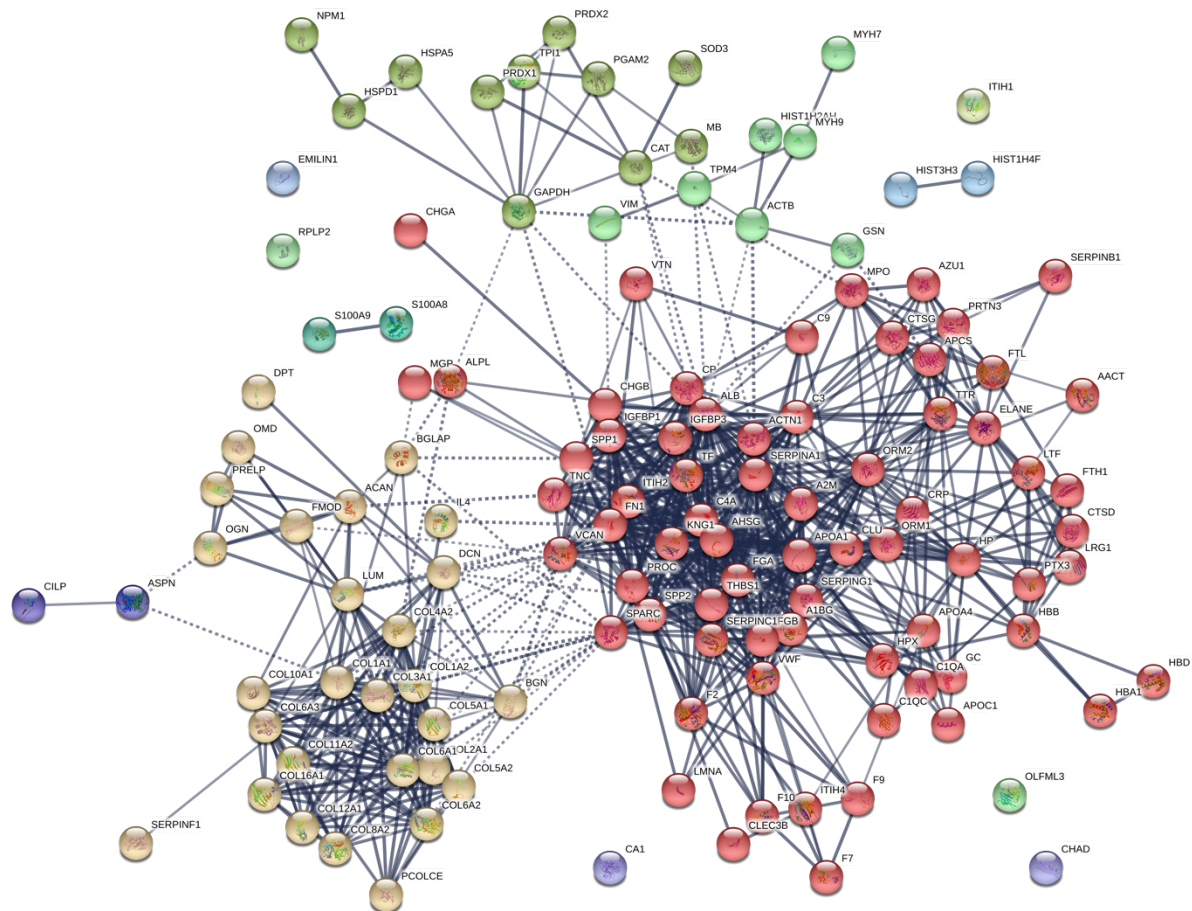

127

128

129

130

131

132

133

134

135

**Figure 1.** STRING protein network of the quantifiable proteins extracted from all samples. Immunoglobulin proteins (gene names IGHA1, IGHG2, IGHG3, IGKC, IGLC2) were not found with STRING and are not represented in the figure. The light orange cluster represents collagenous and collagen-binding proteins, the red one plasma and bone-related proteins, the yellow-green one at the top on the left side ubiquitous proteins and the light green one at the top on the right side some muscle proteins. Other smaller clusters represent other types of proteins interacting less with the major clusters identified.

### 135 Human proteomic inter-skeletal and inter-individual variability

136

137

138

139

140

141

Fresh samples were found to have a significantly greater protein diversity than skeletonized samples (Fig. 2A), and fresh iliac samples were the richest samples analysed, both in terms of proteome diversity (average of 55 different proteins in iliac fresh samples versus 27 for tibia fresh, 15 for iliac skeletonized and 23 for tibia skeletonized, see Supplementary Data 3 for details) and protein relative abundances (Supplementary Data 4). In fact, among the 116 proteins with significantly different relative abundances between the various bone and

142 sampling types (e.g., fresh vs. skeletonized), 105 (90.5%) were more abundant in the fresh  
143 iliac samples, eight (6.9%) in the skeletonized tibia samples, two (1.7%) in the fresh tibia  
144 samples and one (0.9%) in the skeletonized iliac samples (Supplementary Data 4). When  
145 comparing iliac fresh and skeletonized samples, 96 proteins had a significantly different  
146 abundance in the two groups, all of which were more abundant in fresh than in skeletonized  
147 samples (Fig. 3 and Supplementary Data 5). Comparison of the fresh and skeletonized tibia  
148 samples revealed 23 proteins with significantly different expression in the two groups, of  
149 which 19 were more abundant in the fresh samples and four in the skeletonized samples (Fig.  
150 3 and Supplementary Data 5).

151 Comparison of inter-individual proteome variability of fresh bones only (to exclude  
152 any difference caused by taphonomic phenomena) showed that samples collected from D2  
153 had a richer proteome variety (average number 62 for D2 versus 34, 33 and 35 for D1, D3 and  
154 D4 respectively), although this difference was not statistically significant (Fig. 2B). Comparing  
155 inter-individual relative protein abundances (Supplementary Data 6), we found 41 proteins  
156 that showed differences in their relative abundances among the donors. Of these, 36 (87.8%)  
157 were more abundant in D2, two each in D1 and D4 (4.9%) and one in D3 (2.4%).

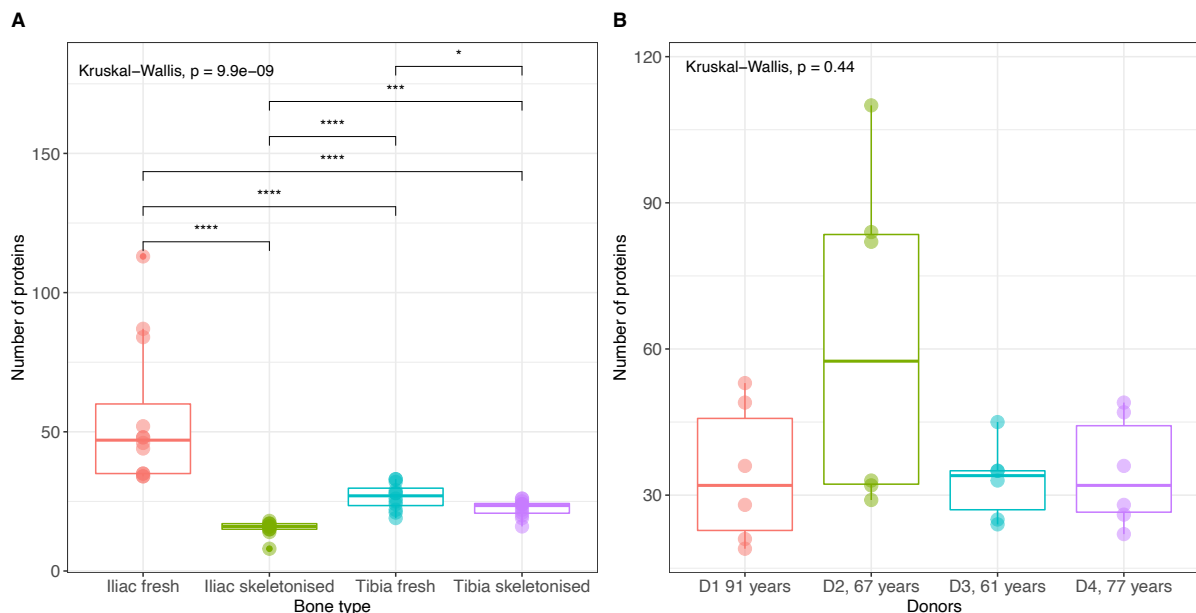

158 **Figure 2. A)** Number of proteins extracted from each sample. Samples were grouped according to bone  
159 type. All bone types were significantly different each other (post-hoc pairwise Wilcoxon-test with  
160 corrections for multiple testing,  $p$  value  $< 0.0002 = ****$ ,  $p$  value  $< 0.002 = ***$ ,  $p$  value  $< 0.01 = *$ ). Outliers  
161 are represented as pointed-dots in the plot (two outliers identified here, one for iliac fresh (sample NP14,  
162 see Table 1 for details) and one for tibia iliac skeletonized group (sample NP45, see Table 1 for details)). **B)**  
163 Number of proteins extracted from fresh samples. Samples were grouped according to the donor. None of  
164 the donors resulted in being significantly different each other (post-hoc pairwise Wilcoxon-test with  
165 corrections for multiple testing,  $p$  value  $> 0.05$ ).  
166  
167



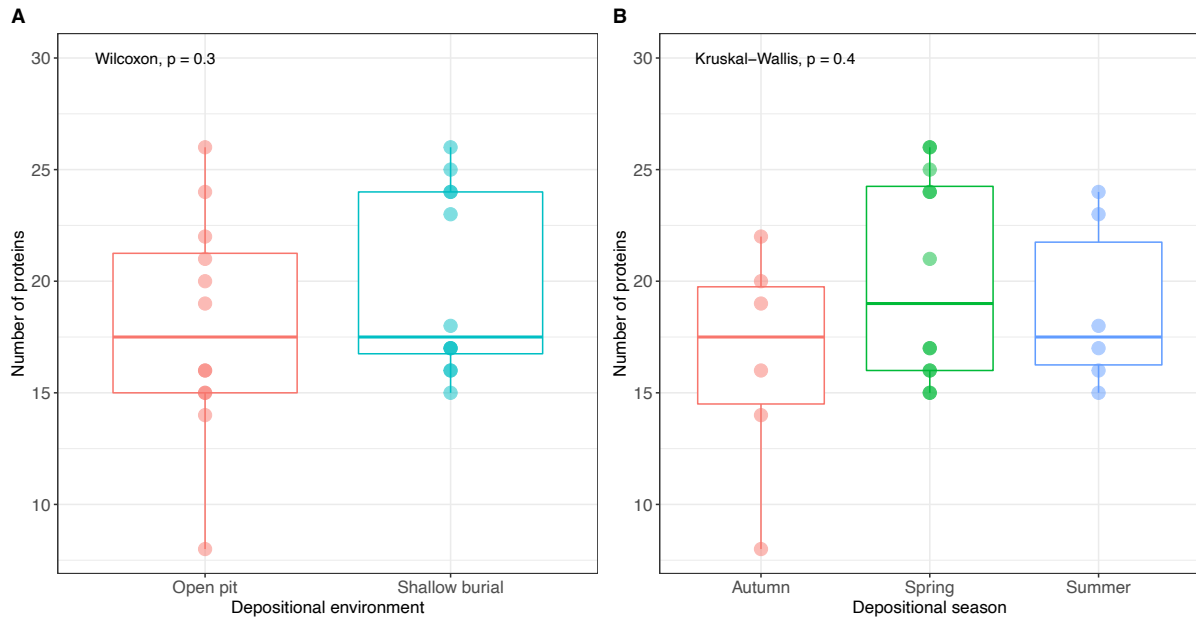

185  
186 **Figure 4.** Number of proteins extracted from skeletonized samples, grouped by **A)** depositional  
187 environment or **B)** placement season. No significant differences were detected (Wilcoxon and Kruskal-  
188 Wallis  $p$  value  $> 0.05$ ).

189

#### 190 **Potential proteomic biomarkers for human PMI estimation**

191 No association was found between the number of extracted proteins and the PMI of the  
192 samples. However, significant decreases in the abundance of collagen alpha-1(III) chain  
193 (CO3A1;  $p=0.0041$ ), complement C9 (CO9;  $p=1.9e-06$ ), collagen alpha-2(XI) chain (COBA2;  
194  $0.00055$ ), matrix Gla protein (MGP;  $p=5.3e-05$ ), decorin (PGS2;  $p=0.045$ ) and transthyretin  
195 (TTHY;  $p=0.035$ ) in iliac crest (Fig. 5A-F) and of complement C3 (CO3) in tibia ( $p=0.023$ ; Fig.  
196 5G) were observed when comparing the protein abundances of the skeletonized samples.

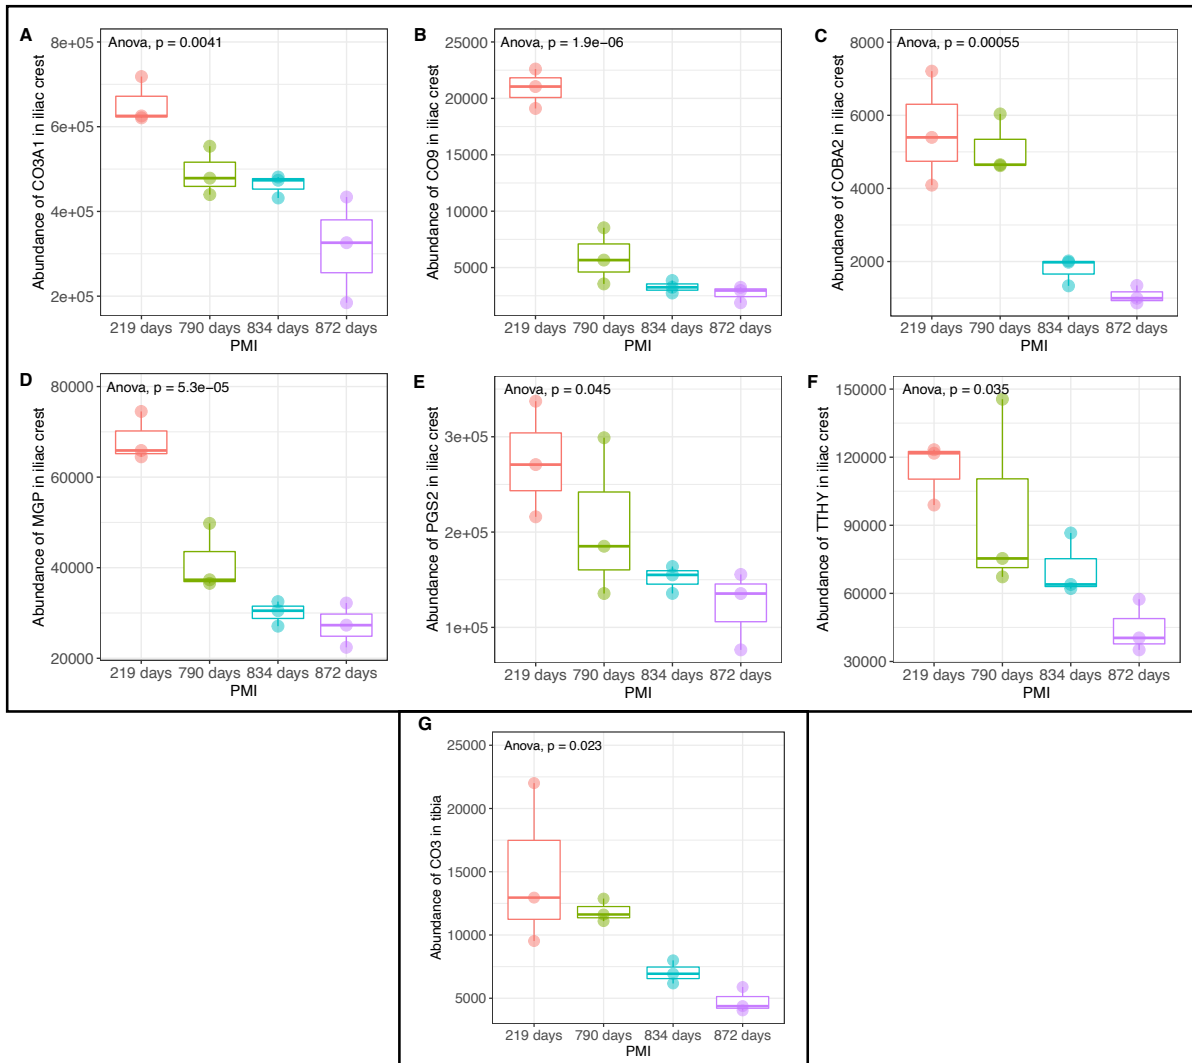

197  
198 **Figure 5.** Abundance of **A)** CO3A1, **B)** CO9, **C)** COBA2, **D)** MGP, **E)** PGS2, **F)** TTHY protein in iliac crest  
199 skeletonized samples and of **G)** CO3 in tibia skeletonised samples with increasing PMIs. Groups are  
200 significantly different each other (ANOVA  $p$  value  $< 0.05$ ).

### 201 **Potential proteomic biomarkers for human AAD estimation**

202 The relative abundance of fetuin-A was found to be negatively associated with AAD in fresh  
203 tibia ( $p=0.033$ ) and in skeletonized iliac samples ( $p=0.013$ ). Skeletonized tibia samples showed  
204 lower levels for the oldest donor and higher levels for the other, but no significant trend was  
205 found ( $p=0.34$ ). Iliac fresh samples showed similar levels in D2 and D3 and lower values for  
206 D1 and D4 ( $p=0.34$ ; Fig. 6A-D).

207 Significant differences in albumin abundance were found between different donors  
208 for both fresh ( $p=0.011$ ) and skeletonized ( $p=0.016$ ) iliac samples (Fig. 6E-H). In particular,  
209 fresh iliac samples showed a positive association with AAD, while fresh and skeletonized tibia  
210 samples both showed a negative relationship with AAD, although these results were not  
211 significant (Fig. 6; ( $p=0.12$  and  $0.35$ , respectively).

212 Additionally, a significant increase in the abundance of olfactomedin-like protein 3  
213 (OLF3) was observed in skeletonized iliac samples with increasing AAD (Fig. 6G;  $p=0.031$ ).



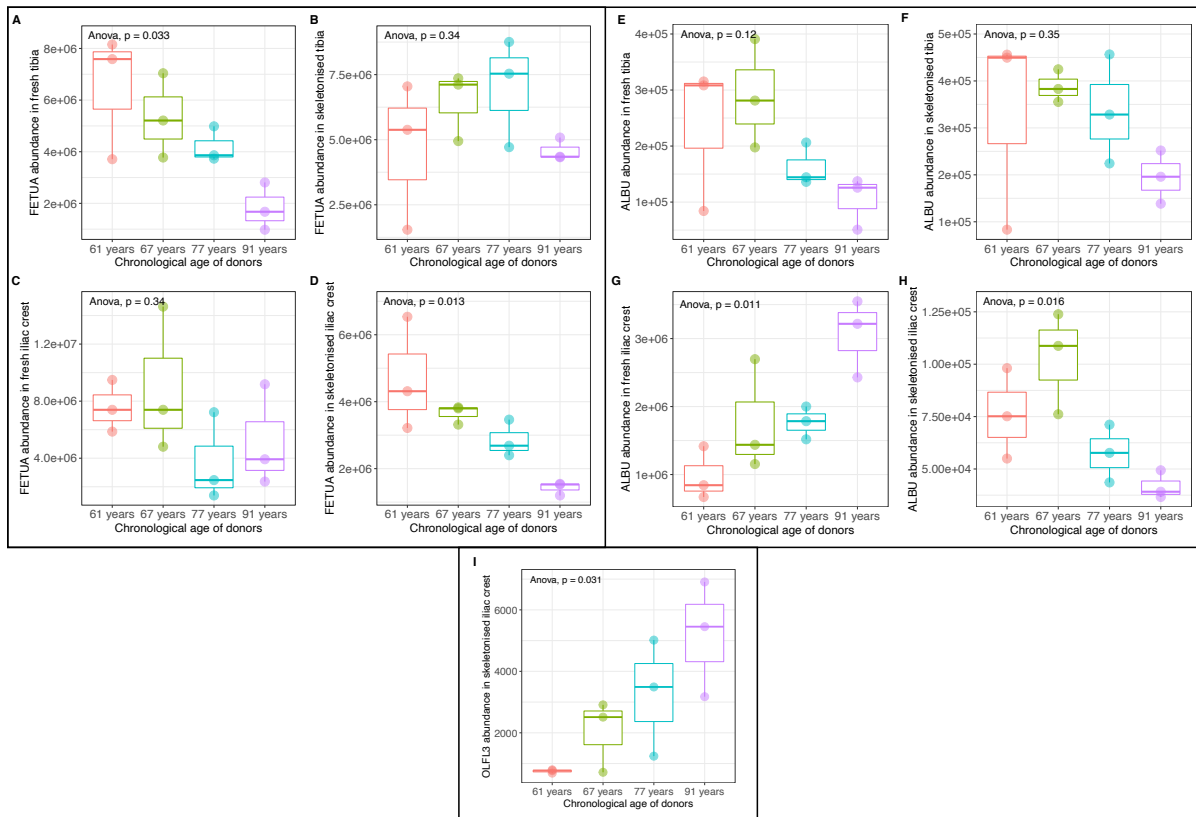

214  
215 **Figure 6.** Relative abundance of fetuin-A in **A)** fresh tibia, **B)** skeletonized tibia, **C)** fresh iliac crest and **D)**  
216 skeletonized iliac crest samples, of albumin in **E)** fresh tibia, **F)** skeletonized tibia, **G)** fresh iliac crest and **H)**  
217 skeletonized iliac crest samples and of **I)** orfantomedin like-3 in skeletonized iliac crest samples, arranged  
218 by the chronological age of the donors. ANOVA p value was reported for each plot. Only A), D), G), H) and  
219 I) resulted in being statistically significant.

220

### 221 3. Discussion

222 In this study, we identified specific proteins that significantly decreased in abundance with  
223 increasing PMI: complement C3 for tibia and collagen alpha-1(III) chain, complement C9,  
224 collagen alpha-2(XI) chain, matrix Gla protein, decorin and transthyretin for iliac crest. Four  
225 of the identified proteins are classified as bone structural/functional proteins (CO3A1, COBA2,  
226 MGP and PGS2) and three are plasma proteins (CO3, CO9 and TTHY). Previous work,  
227 conducted on animal proxies (pigs) left to decompose for a maximum of six months<sup>35</sup>,  
228 revealed a similar trend of consistently decreasing protein abundances over time, but for  
229 different proteins: haemoglobins, transferrins, triosephosphate isomerase, collagen alpha-  
230 2(V) chain and albumin. Both studies showed a reduction in the abundances of plasma and  
231 ubiquitous proteins, but reduction in bone structural/functional proteins was observed only  
232 in the current study. It is known that certain mineral-binding proteins (including structural  
233 ones) are susceptible to taphonomic processes of decay and diagenesis with prolonged  
234 PMIs<sup>36</sup>. The difference in duration and in the depositional environment and local climate  
235 between the pig study and the present study, and the resulting longer exposure to  
236 taphonomic processes, could therefore explain the different trends in mineral-binding  
237 protein abundances reduction that we observed. Analysis of human femoral bones from a  
238 cemetery context by Prieto-Bonete and colleagues<sup>34</sup> also revealed a distinct reduction in the  
239 amount of structural and functional proteins in the highest PMI samples (13-20 years). Among  
240 the list of proteins identified in their study as biomarkers for prolonged PMIs, COBA2 was the  
241 only one that was also found here showing a similar inverse association with increasing PMIs

242 in the present study. Overall, these findings suggest that COBA2 could be a good candidate  
243 for PMI estimation of human skeletonized remains, due to its durability over time and under  
244 different taphonomical conditions.

245 Our study found that the abundance of OLFL3, an osteoblast secreted extracellular  
246 matrix glycoprotein<sup>37</sup>, was positively associated with AAD in skeletonized iliac samples,  
247 adding a previously unreported protein to the list of potential biomarkers for AAD. Previous  
248 studies on animal and archaeological human bones identified a negative correlation between  
249 serum fetuin-A and AAD<sup>21,38</sup>, and proposed fetuin-A as potential biomarker for AAD<sup>39</sup>. The  
250 present study identified a similar negative relationship in fresh tibia and skeletonized iliac  
251 crest samples, but not in fresh iliac and skeletonized tibia. In addition to fetuin-A, several  
252 studies showed that serum albumin concentration is negatively correlated with AAD<sup>40,41</sup>. The  
253 present study found a non-significant negative correlation both in fresh and skeletonized tibia  
254 samples, but an opposite and significant trend in fresh iliac samples. Considering the relatively  
255 small sample size, it is difficult to interpret these findings. Based on observations of bone  
256 properties (hardness, weight, coloration) during sampling of the bone we postulate that inter-  
257 individual differences in bone mineral density (BMD; discussed below) as well as the inter-  
258 skeletal differences in BMD (i.e., iliac bone is less densely mineralised than tibia), may have  
259 affected these results. BMD is known to vary between different parts of the skeleton<sup>42</sup>. With  
260 regards to inter-individual BMD differences it is important to note that our observations do  
261 not constitute quantified measurements of mass-to-volume ratio, but are observations of the  
262 physical properties of bones during drilling. Our study used three biological replicates,  
263 however using a larger number in future studies might clarify whether fetuin-A and albumin  
264 are consistently negatively correlated with AAD in humans in different bone types and  
265 therefore can be used as a biomarker for AAD.

266  
267 The potential effects of BMD on the recovered protein profile are suggested by the  
268 results of inter-individual comparisons. Fresh tibia samples from all four donors showed  
269 greater inter-individual reproducibility than fresh iliac samples. Fresh iliac samples from D2  
270 showed significantly increased protein variety and abundances. Observations during drilling  
271 of the bone samples suggest that BMD in D2 may be relatively high. BMD could theoretically  
272 affect the variety and abundance of specific non-collagenous proteins that can either bind the  
273 calcium ions or the collagen in the mineral matrix<sup>26</sup>, thereby affecting the overall protein  
274 profile. In addition to non-collagenous proteins, many ubiquitous and plasma proteins were  
275 identified predominantly in fresh iliac samples, particularly from D2. Due to the greater blood  
276 irrigation of the iliac crest in comparison with the midshaft tibia, a greater variety of these  
277 types of proteins could be expected in fresh iliac samples (discussed below). In addition to  
278 the observations of bone hardness in D2 made during drilling, the medical information  
279 available for D2 indicates certain conditions and treatments received in the years prior to  
280 death that are associated with changes in BMD, including chemotherapy treatment for  
281 cancer, prolonged consumption of calcium lactate<sup>43</sup> and possible use of probiotics as adjuvant  
282 during cancer treatment<sup>44,45</sup>.

283 The likely greater BMD of D2 may have allowed for a stronger in vivo embedding of  
284 these proteins within the mineral matrix, resulting in the greater proteomic variety observed  
285 here. This effect of BMD on protein linkage in bones would be analogous to positive  
286 relationships observed between organic matter content and soil density, which is often a  
287 function of clay content. In fact, clay particles tend to carry a negative charge to bind with

288 nutrient cations such as calcium and potassium, and these bonds can protect proteins from  
289 decomposition and even from extreme environmental conditions such as autoclaving<sup>46</sup>.

290 The results of inter-skeletal comparisons of the skeletonized samples suggest that  
291 both BMD and taphonomic processes affected the preservation and extraction of the bone  
292 proteome. The highly irrorated and less densely mineralized fresh iliac samples yielded  
293 greater variety and abundance of proteins, including those expressed specifically in plasma.  
294 The proteomes recovered from skeletonized iliac samples demonstrated significant protein  
295 decay occurred in this bone. The denser and less irrorated fresh tibia samples yielded lower  
296 protein variety and abundances by comparison to the fresh iliac samples. Comparison of the  
297 fresh tibia samples with the skeletonized tibia samples showed protein decay also occurred  
298 in this bone, but not to the degree observed in the iliac crest. These results suggest that  
299 differences in BMD and blood irroration between the iliac crest and the midshaft anterior  
300 tibia affected both the successful extraction of proteins from fresh samples, as well as the  
301 preservation in and extraction of proteins from skeletonized samples. Taphonomic processes  
302 of decomposition are known to affect BMD in humans, and can differentially affect skeletal  
303 elements<sup>47,48</sup>. Higher porosity of the iliac exposed this bone to significant deterioration as a  
304 result of taphonomic processes over time, resulting in the reduced inter-individual  
305 differences observed in the skeletonized iliac samples. Protein extraction from the dense and  
306 poorly irrorated fresh anterior midshaft tibia was less successful – at least with the mild  
307 extraction protocol used here – but the structure of this bone led to less taphonomic  
308 deterioration over time.

309 The current results likely indicate the effects of the decomposer community and  
310 physicochemical environment on the decomposition of human remains. A less dense matrix  
311 would facilitate leaching while promoting the movement of decomposer microbes  
312 throughout the bone. Microbial induced bioerosion, which is characterized by the chemical  
313 dissolution of mineral components of bone followed by the microbial enzymatic attack of  
314 organic components of bone, is thought to be one of the main causes of bone diagenesis<sup>49</sup>.  
315 The movement of decomposer microbes might be restricted to the external surfaces of more  
316 densely mineralised bone. The effect of the decomposer microbial community may be further  
317 influenced by the location of the bones. The iliac crest might be subject to greater  
318 decomposition because it is located closer to the trunk, which contains a significant amount  
319 of moisture and a large gastrointestinal microbial community that is known to translocate  
320 during decomposition<sup>50,51</sup>. The iliac crest, therefore, is likely located in a microhabitat that is  
321 favourable for decomposition. In contrast, the tibia is located further from the trunk in limbs  
322 that often desiccate during decomposition. The body position during decomposition of the  
323 four donors was flexed, and allowed the anterior tibiae to remain elevated above  
324 decomposition fluids excreted from the trunk. Desiccation of the soft tissues around the  
325 anterior tibiae was observed early on during decomposition of both open pit placements.  
326 Desiccated, densely mineralised bone is unlikely to be favourable for decomposition.

327 Comparison of samples from open pit placements with samples from burials, as well  
328 as comparison of season of placement in this study found no significant differences. While  
329 archaeological remains have revealed differences in protein recovery related to depositional  
330 environment<sup>23,26,33</sup>, it is possible that due to the relatively short duration of this experiment  
331 such environmental effects were not measurable in this study. It is also possible that the two  
332 depositional environments did not produce distinct enough conditions (Supplementary Table  
333 1) to cause noticeable differences in the preservation of the biomolecules.

334 The preliminary indications from this study support previous findings that specific  
335 proteins decay at different rates, strengthening the potential for developing bone proteomics  
336 PMI estimation methods. COBA2 appears to be a good candidate for PMI estimation of  
337 skeletonized remains, together with CO3A1, PGS2 and MGP. The blood proteins CO3, CO9  
338 and TTHY may be good candidates for shorter PMI estimation (i.e., before the complete  
339 degradation of blood proteins). Our study only partially supported previous studies  
340 identifying fetuin-A and albumin as potential biomarkers for AAD estimation, and additionally  
341 found OLFL3 being positively correlated with AAD. At the same time, our findings suggest that  
342 taphonomic (e.g., microbial bioerosion) and biological (e.g., variation in BMD) variables play  
343 a significant role in both the survival and extraction rate of proteins, due to their effects on  
344 the protective mineral matrix.

345 While the sample size is relatively small, the findings point toward potentially significant  
346 effects of inter-individual variation associated with health conditions, medical treatment, and  
347 possibly food and supplement intake. The results of both inter-individual and inter-skeletal  
348 comparisons in our study suggest that BMD may be an important variable affecting the  
349 survival and extraction of proteins in the bone mineral matrix. Higher BMD may promote  
350 attachment of a greater abundance and variety of mineral binding proteins, and in highly  
351 irrorated bones may additionally help to preserve more plasma proteins within the mineral  
352 matrix. Inter-skeletal differences in BMD appear to lead to distinct differences in the variety  
353 and abundance of preserved (and extracted) proteins. The attachment of proteins within a  
354 more densely mineralized bone matrix may protect them during microbial bioerosion. Based  
355 on these indications, we recommend including standard measurement of BMD and targeting  
356 a combination of different biomarkers (i.e., abundances of selected plasma proteins and  
357 bone-specific proteins) in future work. Overall, these results emphasize the limitations of  
358 developing methods and models based on animal proxies, since farmed animals rarely show  
359 the degree of inter-individual dietary and activity related variation that humans do, and BMD  
360 and degree of irroration of bones differ between species<sup>52</sup>. Moreover, these results  
361 emphasize the importance of conducting replication studies in larger human samples  
362 representing a broader range of PMIs and AAD, as well as sampling different bones, to better  
363 understand how different types of proteins and different parts of the human skeleton are  
364 affected by inter-individual variation and taphonomic processes. Finally, preliminary  
365 evaluation of the inter-skeletal differences we observed suggests that for future development  
366 of proteomics PMI estimation methods, the iliac crest bone may be a more suitable sampling  
367 target for relatively fresh remains of forensic interest and for archaeological studies  
368 specifically targeting the serum-proteins, due to the presence of greater protein variety of  
369 bone-marrow proteins. Specific burial conditions, such as dry burial environments, anaerobic  
370 environments, and certain post-mortem treatments of the body (such as embalming  
371 procedures) can limit the amount of bone diagenesis<sup>53,54</sup> thereby promoting the survival of  
372 bone proteins across archaeological timeframes. In such circumstances the iliac crest may  
373 provide better results than the tibia to detect pathologies and infections associated with the  
374 bone marrow. The midshaft tibia may be a more suitable sampling target for skeletonized  
375 remains or those in a state of advanced decomposition of forensic interest, due to the better  
376 survival of collagen and mineral-related proteins that could be ultimately used for developing  
377 new biomolecular methods for PMI/AAD estimation.

378

#### 379 **4. Methods**

380

381 Body donations

382 The body donations of four females aged between 61 and 91 years old were placed unclothed  
383 to decompose at the Forensic Anthropology Research Facility (FARF), the outdoor human  
384 decomposition facility associated with the Forensic Anthropology Center at Texas State  
385 University (FACTS), between April 2015 and March 2018. While the targeted bone proteins in  
386 this study are not thought to differ between males and females, only post-menopausal female  
387 individuals were included, in order to exclude biological sex and major hormonal differences  
388 as a potential variable from the study. Two body donations (D2 and D3) were buried with soil  
389 in shallow hand dug pits. Two body donations (D1 and D4) were placed in pits of similar  
390 dimensions, which remained open throughout the experiment. Open pits were covered with  
391 a metal cages to protect the remains from large scavengers. The sample size in this study  
392 reflects general trends in human decomposition research, in which larger samples – like those  
393 used in clinical studies – can be difficult to obtain for practical, logistical and ethical reasons.  
394 While animal analogues such as pigs can be used to alleviate some limitations associated with  
395 small sample sizes, the study of human cadavers is important due to biological differences  
396 between humans and pigs, including anatomical differences in the digestive vasculature, and  
397 molecular differences in adipose tissue<sup>55</sup>.

398 Data on body decomposition and weather were collected throughout the experiment  
399 and can be found in Supplementary Table 1. Additional information on FARF's environment  
400 can be found in the Supplementary Information. Gross decomposition was quantified using  
401 the total body score (TBS) method following Megyesi et al.<sup>56</sup>. Accumulated degree-days (ADD)  
402 were calculated using temperature data recorded on the facility.

403

404 Bone sample collection

405 Bone samples (ca. 1 x 1 cm) of the anterior midshaft tibia and iliac crest (left) were collected  
406 prior to placement of the fresh body outside and upon retrieval of the completely  
407 skeletonized remains (right). The total 16 bone samples were stored in sterile plastic bags,  
408 and immediately transferred to a lockable freezer at -80°C. Samples were shipped overnight  
409 on dry ice to the Forensic Science Unit at Northumbria University, U.K. Upon arrival,  
410 the samples were immediately transferred to a lockable freezer at -18°C, adhering to the U.K.  
411 Human Tissue Act under the license number 12495. The experiment was reviewed and  
412 approved by the ethics committee at Northumbria University, with the reference code 11623.  
413 All biological and bone sample data are provided in Table 1. Observations on bone condition  
414 (density and colour) during sampling can be found in the Supplementary Information.

415

416 Sub-sampling and sample preparation

417 The 16 samples were defrosted prior to their analysis, then cleaned in deionized water for  
418 three hours at room temperature, exchanging the water three times, once every hour. They  
419 were then dried in a fume cupboard at room temperature until completely dry. Bone samples  
420 were then secured in a table clamp for the sampling. Contamination between samples was  
421 prevented by using a double layer of aluminium foil within the clamp (in contact with the  
422 bone) and by using new foil double layers for each piece of bone sampled. The clamp was also  
423 cleaned in between each sampling step using 50% sodium hypochlorite (Sigma-Aldrich, U.K.),  
424 to further prevent contamination issues. Once the bone was secured in the clamp, Dentist's  
425 Protaper Universal Hand Files (Henry Schein Minerva Dental, U.K.) were used to hand-drill  
426 ~25mg of fine bone powder for three times (i.e. three samplings were performed on the same  
427 bone fragment), in order to obtain three replicates for each of the bones analysed. By

428 sampling in different locations close together on the same bone, we obtained multiple  
429 biological samples. Since it is known that bone proteins can vary throughout the human  
430 skeleton and within individual bones, these biological replicates, in contrast to technical  
431 replicates, allow us to assess the degree of intra-bone variability and to establish whether  
432 inter-individual differences are greater than the intra-bone variability, as indicated in a  
433 previous study using pigs as proxies<sup>31</sup>. Protaper files were changed between each sample, to  
434 prevent contamination. When the bone samples were too porous to obtain a fine bone  
435 powder (e.g., iliac crest samples), small bone fragments were cut using the Protaper files, and  
436 ~25mg of bone fragments were collected for each of the three subsamples in order to have  
437 three replicates.

438

#### 439 Protein extraction

440 Overall, 48 samples were obtained from the 16 bone pieces, and were subjected to bone  
441 protein extraction following the protocol of Procopio and Buckley<sup>57</sup>.

442 Briefly, each sample was decalcified with 1 mL of 10 v/v% formic acid (Fisher Scientific, U.K.)  
443 for 6 hours at 4 °C. After removing all the acid soluble fraction, the acid insoluble fraction was  
444 incubated for 18 hours at 4°C with 500 µL of 6 M guanidine hydrochloride/100mM TRIS buffer  
445 (pH 7.4, Sigma-Aldrich, U.K.). The buffer was exchanged into 100 µL of 50 mM ammonium  
446 acetate (Scientific Laboratory Supplies, U.K.) with 10K molecular-weight cut off filters  
447 (Vivaspin 500 polyethersulfone, 10kDa, Sartorius, Germany), and samples were then reduced  
448 with 4.2 µL of 5 mM dithiothreitol (DTT) (Fluorochem, U.K.) for 40 min at room temperature  
449 and alkylated with 16.8 µL of 15 mM iodoacetamide (Sigma-Aldrich, U.K.) for 45 min in the  
450 dark at room temperature. Samples were then quenched with another 4.2 µL of 5 mM DTT,  
451 then digested with 0.4 µg of trypsin (Promega, U.K.) for 5 hours at 37°C and finally frozen. By  
452 adding 15 µL of 1 v/v% trifluoroacetic acid (TFA) (Fluorochem, U.K.), the digestion was  
453 stopped and the samples were then desalted, concentrated and purified using OMIX C18  
454 pipette tips (Agilent Technologies, U.S.A.) with 0.1 v/v% TFA as washing solution and 50 v/v%  
455 acetonitrile (ACN) (Thermo Fisher Scientific, U.K.)/0.1 v/v% TFA as a conditioning solution.  
456 Pipette tips were prepared with two volumes of 100 µL of 0.1 v/v% TFA and washed twice  
457 with 100 µL of 50 v/v% ACN/0.1 v/v% TFA. The sample was then aspirated into the tip at least  
458 ten times to efficiently bind peptides to the absorbent membrane. Finally, two washing steps  
459 with 100µL of 0.1 v/v% TFA were performed, prior to peptides elution into 100 µL of 50 v/v%  
460 ACN/0.1 v/v% TFA. Purified peptides were left in the fume cupboard at room temperature  
461 with lids open to dry prior to their submission for LC-MS/MS analysis.

462

#### 463 LC/MS-MS analysis

464 Samples resuspended in 5 v/v% ACN/0.1 v/v% TFA were analyzed by LC-MS/MS using an  
465 Ultimate™ 3000 Rapid Separation LC (RSLC) nano LC system (Dionex Corporation, Sunnyvale,  
466 CA, USA) coupled to a Q Exactive™ Plus Hybrid Quadrupole-Orbitrap Mass Spectrometer  
467 (Thermo Fisher Scientific, Waltham, MA, U.S.A.). Peptides were separated on an EASY-Spray™  
468 reverse phase LC Column (500 mm x 75 µm diameter (i.d.), 2 µm, Thermo Fisher Scientific,  
469 Waltham, MA, USA) using a gradient from 96 v/v% A (0.1 v/v% FA in 5 v/v% ACN) and 4 v/v%  
470 B (0.1 v/v% FA in 95 v/v% ACN) to 8 v/v%, 30 v/v% and 50% B at 14, 50, and 60 min,  
471 respectively, at a flow rate of 300 nL min<sup>-1</sup>. Acclaim™ PepMap™ 100 C18 LC Column (5 mm x  
472 0.3 mm i.d., 5 µm, 100 Å, Thermo Fisher Scientific) was used as trap column at a flow rate of  
473 25 µL min<sup>-1</sup> kept at 45 °C. The LC separation was followed by a cleaning cycle with an  
474 additional 15 min of column equilibration time. Then, peptide ions were analyzed in full scan

475 MS scanning mode at 35,000 MS resolution with an automatic gain control (AGC) of 1e6,  
476 injection time of 200 ms and scan range of 375-1,400 m/z. The top ten most abundant ions  
477 were selected for data-dependent MS/MS analysis with a normalized collision energy (NCE)  
478 level of 30 performed at 17,500 MS resolution with an AGC of 1e5 and maximum injection  
479 time of 100 ms. The isolation window was set to 2.0 m/z, with an underfilled ratio of 0.4%,  
480 dynamic exclusion was employed; thus, one repeat scan (i.e., two MS/MS scans in total) was  
481 acquired in a 45 s repeat duration with the precursor being excluded for the subsequent 45  
482 s.

483

#### 484 Data analysis and statistical analysis

485 Peptide mass spectra were then searched against the SwissProt\_2019\_11 database (selected  
486 for Homo sapiens, unknown version, 20368 entries) using the Mascot search engine (version  
487 2.5.1; [www.matrixscience.com](http://www.matrixscience.com)) for matches to primary protein sequences. This search  
488 included the fixed carbamidomethyl modification of cysteine as it results from addition of DTT  
489 to proteins. Deamidation (asparagine and glutamine) and oxidation (lysine, methionine and  
490 proline) were considered as variable modifications. The enzyme was set to trypsin with a  
491 maximum of two missed cleavages allowed. Mass tolerances for precursor and fragmented  
492 ions were set at 5 ppm and 0.5 Da, respectively. It was assumed that all spectra hold either  
493 2+ or 3+ charged precursors. Scaffold (version Scaffold\_4.10.0, Proteome Software Inc.,  
494 Portland, OR) was used to validate MS/MS based peptide and protein identifications. Peptide  
495 identifications were accepted if they could be established at greater than 95.0% probability  
496 to maximise the reliability of the identifications. Peptide Probabilities from Mascot were  
497 assigned by the Scaffold Local FDR algorithm and by the Peptide Prophet algorithm<sup>58</sup> with  
498 Scaffold delta-mass correction. Protein identifications were accepted if they could be  
499 established at greater than 90.0% probability and contained at least 2 identified peptides, in  
500 order to filter for the most accurate matches. This resulted in having a calculated decoy FRD  
501 of 0.06% for peptides and 1.9% for proteins. Protein probabilities were assigned by the  
502 Protein Prophet algorithm<sup>59</sup>. Proteins that contained similar peptides and could not be  
503 differentiated based on MS/MS analysis alone were grouped to satisfy the principles of  
504 parsimony. Proteins sharing significant peptide evidence were grouped into clusters.  
505 Progenesis Qi for Proteomics (version 4.1; Nonlinear Dynamics, Newcastle, U.K.) was used to  
506 perform relative quantitation calculations using the recorded ion intensities (area under the  
507 curve, AUC) and averaging the N most abundant peptides for each protein (Hi-N method,  
508 where N=3) and protein and post-translational modifications identifications. In order to  
509 increase the reliability of the matches, peptide ions with a score of <28, which indicates  
510 identity or extensive homology ( $p < 0.05$ ), were excluded from the analysis based on the  
511 Mascot evaluation of the peptide score distribution for the searched .mgf file originating from  
512 Progenesis (combining all the samples in a single experiment). To further improve the  
513 reliability of the findings we implemented an additional level of filtering, excluding proteins  
514 with a peptide count of <2. Samples were grouped together using the between-subject design  
515 scheme in Progenesis, in order to compare selected group of samples (e.g. skeletonised  
516 versus fresh bones) and to calculate ANOVA p-values and maximum fold changes accordingly.  
517 The use of three biological replicates per targeted bone sample provided a sufficiently large  
518 dataset for comparative analysis using non-parametric statistical methods such as ANOVA,  
519 posthoc pairwise comparison, and Kruskal-Wallis tests. To identify proteins of interest,  
520 proteins were flagged up in order to highlight the ones that had an ANOVA p-value  $\leq 0.05$  and  
521 a maximum fold change  $\geq 2$ . Common contaminants such as keratins were excluded from the

522 interpretation of the results. Plots were done using R studio version 1.2.5033 with packages  
523 dplyr, ggplot2, ggpubr and patchwork packages. When plotting boxplots, for data following a  
524 normal distribution student's t test and one-way ANOVA and post-hoc pairwise comparisons  
525 were used to test mean differences, otherwise Wilcoxon rank sum test and Kruskal Wallis test  
526 with post-hoc pairwise comparisons were used. STRING software version 11.0 was used to  
527 visualize functional links between the extracted proteins<sup>60</sup>. The confidence score required for  
528 showing interactions was set to "high = 0.700". MCL clustering method was used to identify  
529 the clusters, with inflation parameter = 1.5.

530

### 531 **Data availability**

532 The mass spectrometry proteomics data have been deposited to the ProteomeXchange  
533 Consortium via the PRIDE<sup>61</sup> partner repository with the dataset identifier PXD019693 and  
534 10.6019/PXD019693".

535

### 536 **Reviewer account details:**

537 **Username: reviewer46348@ebi.ac.uk**

538 **Password: QkJJd6VZ**

539

540

### 541 **Acknowledgements**

542 The authors would like to acknowledge the Royal Society for funding a Research Grant (N.P.)  
543 under grant RGS/R1/191371, the UKRI for funding part of the research through a Fellowship  
544 (N.P.) under grant MR/S032878/1, as well as the European Research Council for funding part  
545 of the research under grant 319209 and the Leiden University Fund for funding under Byvanck  
546 grant 5604/30-4-2015/Byvanck. Dr. William Cheung at the NUOmics Facility is acknowledged  
547 for conducting the LC-MS/MS runs. The authors also gratefully acknowledge the donors and  
548 their next of kin for allowing the use of donated bodies to perform this research.

549

### 550 **Author Contributions**

551 H.L.M. and N.P. conceived the study and wrote the paper. Text editing by all co-authors. N.P.  
552 was the lead on all proteomics experiments. H.L.M. was the lead on the human  
553 decomposition experiments and bone sampling at FACTS. D.W. was the lead on  
554 environmental data collection at FARF. H.L.M., N.P. and D.C. contributed to the interpretation  
555 of the results. N.P. and S.S. executed protein extraction, N.P. and E.S. conducted data analysis  
556 and F.S. and H.M. contributed to data analysis and to the creation of graphical outputs tables  
557 and supplementary data.

558

### 559 **Competing interests**

560 The authors declare there are no financial or non-financial competing interests.

561

### 562 **References**

- 563 1. White, B. United Kingdom. in *The Routledge handbook of archaeological human*  
564 *remains and legislation: An international guide to laws and practice in the excavation*  
565 *and treatment of archaeological human remains* (eds. Grant, N. M. & Fibiger, L.) 205–  
566 206 (Taylor & Francis, 2011).
- 567 2. Creamer, J. I. & Buck, A. M. The assaying of haemoglobin using luminol  
568 chemiluminescence and its application to the dating of human skeletal remains.



- 569 *Luminescence* **24**, 311–316 (2009).
- 570 3. Christensen, A. M., Passalacqua, N. V & Bartelink, E. J. *Forensic anthropology: current*  
571 *methods and practice*. (Elsevier Inc., 2019).
- 572 4. Ritz-Timme, S. *et al.* Age estimation: the state of the art in relation to the specific  
573 demands of forensic practise. *Int. J. Legal Med.* **113**, 129–136 (2000).
- 574 5. Junod, C. A. & Pokines, J. T. Subaerial Weathering. in *Manual of Forensic Taphonomy*  
575 (eds. Pokines, J. T. & Symes, S. A.) 287–314 (CRC Press, 2013).
- 576 6. Wilson-Taylor, R. J. & Dautartas, A. M. Time since death estimation and bone  
577 weathering, the post mortem interval. in *Forensic anthropology: a comprehensive*  
578 *introduction* 273–313 (CRC Press Boca Raton, 2017).
- 579 7. Huculak, M. A. & Rogers, T. L. Reconstructing the sequence of events surrounding  
580 body disposition based on color staining of bone. *J. Forensic Sci.* **54**, 979–984 (2009).
- 581 8. Berg, S. Methods in Forensic Science. in *Interscience* vol. 2 (Wiley and Sons New York,  
582 1963).
- 583 9. Wescott, D. J. Recent advances in forensic anthropology: decomposition research.  
584 *Forensic Sci. Res.* **3**, 278–293 (2018).
- 585 10. Blau, S. & Ubelaker, D. H. *Handbook of forensic anthropology and archaeology*. vol.  
586 534 (Left Coast Press Walnut Creek, 2009).
- 587 11. Kanz, F., Reiter, C. & Risser, D. U. Citrate content of bone for time since death  
588 estimation: results from burials with different physical characteristics and known  
589 PMI. *J. Forensic Sci.* **59**, 613–620 (2014).
- 590 12. Pérez-Martínez, C., Pérez-Cárceles, M. D., Legaz, I., Prieto-Bonete, G. & Luna, A.  
591 Quantification of nitrogenous bases, DNA and Collagen type I for the estimation of  
592 the postmortem interval in bone remains. *Forensic Sci. Int.* **281**, 106–112 (2017).
- 593 13. Sarabia, J., Pérez-Martínez, C., del Rincón, J. P. H. & Luna, A. Study of  
594 chemiluminescence measured by luminometry and its application in the estimation of  
595 postmortem interval of bone remains. *Leg. Med.* **33**, 32–35 (2018).
- 596 14. Brown, M. A. *et al.* Citrate Content of Bone as a Measure of Postmortem Interval: An  
597 External Validation Study. *J. Forensic Sci.* **63**, 1479–1485 (2018).
- 598 15. Priya, E. Methods of skeletal age estimation used by forensic anthropologists in  
599 adults: a review. *Forensic Res Criminol Int J* **4**, 104 (2017).
- 600 16. Franklin, D. Forensic age estimation in human skeletal remains: current concepts and  
601 future directions. *Leg. Med.* **12**, 1–7 (2010).
- 602 17. Lewis, M. E. & Flavel, A. Age assessment of child skeletal remains in forensic contexts.  
603 in *Forensic Anthropology and Medicine* (eds. Schmitt, A., Cunha, E. & Pinheiro, J.)  
604 243–257 (Humana Press, 2006).
- 605 18. Baccino, E. & Schmitt, A. Determination of adult age at death in the forensic context.  
606 in *Forensic Anthropology and Medicine* (eds. Schmitt, A., Cunha, E. & Pinheiro, J.)  
607 259–280 (Humana Press, 2006).
- 608 19. Schmitt, A., Murail, P., Cunha, E. & Rougé, D. Variability of the pattern of aging on the  
609 human skeleton: evidence from bone indicators and implications on age at death  
610 estimation. *J. Forensic Sci.* **47**, 1203–1209 (2002).
- 611 20. Valsecchi, A., Olivares, J. I. & Mesejo, P. Age estimation in forensic anthropology:  
612 methodological considerations about the validation studies of prediction models. *Int.*  
613 *J. Legal Med.* **133**, 1915–1924 (2019).
- 614 21. Sawafuji, R. *et al.* Proteomic profiling of archaeological human bone. *R. Soc. Open Sci.*  
615 **4**, 161004 (2017).

- 616 22. Devièse, T. *et al.* Direct dating of Neanderthal remains from the site of Vindija Cave  
617 and implications for the Middle to Upper Paleolithic transition. *Proc. Natl. Acad. Sci.*  
618 *U. S. A.* **114**, 10606–10611 (2017).
- 619 23. Wadsworth, C. *et al.* Comparing ancient DNA survival and proteome content in 69  
620 archaeological cattle tooth and bone samples from multiple European sites. *J.*  
621 *Proteomics* 1–8 (2017) doi:10.1016/j.jprot.2017.01.004.
- 622 24. Brown, S. *et al.* Identification of a new hominin bone from Denisova Cave, Siberia  
623 using collagen fingerprinting and mitochondrial DNA analysis. *Sci. Rep.* **6**, 23559  
624 (2016).
- 625 25. Mackie, M. *et al.* Preservation of the metaproteome: variability of protein  
626 preservation in ancient dental calculus. *STAR Sci. Technol. Archaeol. Res.* **3**, 58–70  
627 (2017).
- 628 26. Buckley, M. & Wadsworth, C. Proteome degradation in ancient bone: diagenesis and  
629 phylogenetic potential. *Palaeogeogr. Palaeoclimatol. Palaeoecol.* **416**, 69–79 (2014).
- 630 27. Buckley, M. A molecular phylogeny of Plesiorcycteropus reassigns the extinct  
631 mammalian order 'Bibymalagasia'. *PLoS One* **8**, e59614 (2013).
- 632 28. Dorado, G. *et al.* Genomics and proteomics in bioarchaeology. *Archaeobios* 4–17  
633 (2013).
- 634 29. Harvey, V. L. *et al.* Preserved collagen reveals species identity in archaeological  
635 marine turtle bones from Caribbean and Florida sites. *R. Soc. Open Sci.* **6**, 191137  
636 (2019).
- 637 30. Buckley, M. Proteomics in the Analysis of Forensic, Archaeological, and  
638 Paleontological Bone. in *Applications in Forensic Proteomics: Protein Identification*  
639 *and Profiling* 125–141 (ACS Publications, 2019).
- 640 31. Procopio, N., Chamberlain, A. T. & Buckley, M. Intra- and Interskeletal Proteome  
641 Variations in Fresh and Buried Bones. *J. Proteome Res.* **16**, (2017).
- 642 32. Procopio, N., Williams, A., Chamberlain, A. T. & Buckley, M. Forensic proteomics for  
643 the evaluation of the post-mortem decay in bones. *J. Proteomics* **177**, 21–30 (2018).
- 644 33. Procopio, N., Chamberlain, A. T. & Buckley, M. Exploring Biological and Geological  
645 Age-related Changes through Variations in Intra- and Intertooth Proteomes of  
646 Ancient Dentine. *J. Proteome Res.* **17**, (2018).
- 647 34. Prieto-Bonete, G., Pérez-Cárceles, M. D., Maurandi-López, A., Pérez-Martínez, C. &  
648 Luna, A. Association between protein profile and postmortem interval in human bone  
649 remains. *J. Proteomics* **192**, 54–63 (2019).
- 650 35. Procopio, N., Williams, A., Chamberlain, A. T. & Buckley, M. Forensic proteomics for  
651 the evaluation of the post-mortem decay in bones. *J. Proteomics* **177**, (2018).
- 652 36. Wadsworth, C. & Buckley, M. Proteome degradation in fossils: investigating the  
653 longevity of protein survival in ancient bone. *Rapid Commun. Mass Spectrom.* **28**,  
654 605–615 (2014).
- 655 37. Sanchez, C. *et al.* Comparison of secretome from osteoblasts derived from sclerotic  
656 versus non-sclerotic subchondral bone in OA: A pilot study. *PLoS One* **13**, (2018).
- 657 38. Robinson, K. N. & Teran-Garcia, M. From infancy to aging: biological and behavioral  
658 modifiers of fetuin-A. *Biochimie* **124**, 141–149 (2016).
- 659 39. Procopio, N., Chamberlain, A. T. & Buckley, M. Intra- and Interskeletal Proteome  
660 Variations in Fresh and Buried Bones. *J. Proteome Res.* **16**, 2016–2029 (2017).
- 661 40. Veering, B. T., Burm, A. G., Souverijn, J. H., Serree, J. M. & Spierdijk, J. O. H. The effect  
662 of age on serum concentrations of albumin and alpha 1-acid glycoprotein. *Br. J. Clin.*

- 663            *Pharmacol.* **29**, 201–206 (1990).
- 664    41.    Cooper, J. K. & Gardner, C. Effect of aging on serum albumin. *J. Am. Geriatr. Soc.* **37**,  
665            1039–1042 (1989).
- 666    42.    Njeh, C. F. & Boivin, C. M. Variation in bone mineral density between different  
667            anatomical sites in a normal local population. *Appl. Radiat. Isot.* **49**, 685–686 (1998).
- 668    43.    Devine, A., Criddle, R. A., Dick, I. M., Kerr, D. A. & Prince, R. L. A longitudinal study of  
669            the effect of sodium and calcium intakes on regional bone density in postmenopausal  
670            women. *Am. J. Clin. Nutr.* **62**, 740–745 (1995).
- 671    44.    Collins, F. L., Rios-Arce, N. D., Schepper, J. D., Parameswaran, N. & McCabe, L. R. The  
672            potential of probiotics as a therapy for osteoporosis. *Bugs as Drugs Ther. Microbes*  
673            *Prev. Treat. Dis.* 213–233 (2018).
- 674    45.    McCabe, L., Britton, R. A. & Parameswaran, N. Prebiotic and probiotic regulation of  
675            bone health: role of the intestine and its microbiome. *Curr. Osteoporos. Rep.* **13**, 363–  
676            371 (2015).
- 677    46.    Carter, D. O., Yellowlees, D. & Tibbett, M. Autoclaving kills soil microbes yet soil  
678            enzymes remain active. *Pedobiologia (Jena)*. **51**, 295–299 (2007).
- 679    47.    Hale, A. R. & Ross, A. H. Scanning skeletal remains for bone mineral density in  
680            forensic contexts. *JoVE (Journal Vis. Exp.)* e56713 (2018).
- 681    48.    Lyman, R. L. Bone density and bone attrition. *Man. forensic Taphon.* 51–72 (2014).
- 682    49.    Collins, M. J. *et al.* The survival of organic matter in bone: a review. *Archaeometry* **44**,  
683            383–394 (2002).
- 684    50.    Damann, F. E. & Jans, M. M. E. Microbes, anthropology, and bones. in *Forensic*  
685            *Microbiology* (eds. Carter, D. O., Tomberlin, J. K., Benbow, M. E. & Metcalf, J. L.) 319  
686            (John Wiley & Sons, 2017).
- 687    51.    Mesli, V., Neut, C. & Hedouin, V. Postmortem bacterial translocation. in *Forensic*  
688            *microbiology* (eds. Carter, D. O., Tomberlin, J. K., Benbow, M. E. & Metcalf, J. L.) 192–  
689            211 (John Wiley & Sons, 2017).
- 690    52.    Aerssens, J., Boonen, S., Lowet, G. & Dequeker, J. Interspecies differences in bone  
691            composition, density, and quality: potential implications for in vivo bone research.  
692            *Endocrinology* **139**, 663–670 (1998).
- 693    53.    Child, A. M. Microbial taphonomy of archaeological bone. *Stud. Conserv.* **40**, 19–30  
694            (1995).
- 695    54.    Booth, T. An Investigation into the relationship between bone diagenesis and  
696            funerary treatment. (University of Sheffield, 2014).
- 697    55.    Miles, K. L., Finaughty, D. A. & Gibbon, V. E. A review of experimental design in  
698            forensic taphonomy: moving towards forensic realism. *Forensic Sci. Res.* 1–11 (2020).
- 699    56.    Megyesi, M. S., Nawrocki, S. P. & Haskell, N. H. Using accumulated degree-days to  
700            estimate the postmortem interval from decomposed human remains. *J. Forensic Sci.*  
701            **50**, 1–9 (2005).
- 702    57.    Procopio, N. & Buckley, M. Minimizing Laboratory-Induced Decay in Bone Proteomics.  
703            *J. Proteome Res.* doi:10.1021/acs.jproteome.6b00564.
- 704    58.    Keller, A., Nesvizhskii, A. I., Kolker, E. & Aebersold, R. Empirical statistical model to  
705            estimate the accuracy of peptide identifications made by MS/MS and database  
706            search. *Anal. Chem.* **74**, 5383–5392 (2002).
- 707    59.    Nesvizhskii, A. I., Keller, A., Kolker, E. & Aebersold, R. A statistical model for  
708            identifying proteins by tandem mass spectrometry. *Anal. Chem.* **75**, 4646–4658  
709            (2003).

710 60. Szklarczyk, D. *et al.* STRING v11: protein–protein association networks with increased  
711 coverage, supporting functional discovery in genome-wide experimental datasets.  
712 *Nucleic Acids Res.* **47**, D607–D613 (2019).

713 61. Perez-Riverol, Y. *et al.* The PRIDE database and related tools and resources in 2019:  
714 improving support for quantification data. *Nucleic Acids Res.* **47**, D442–D450 (2019).

715

## 716 **Supplementary information**

717

### 718 Supplementary Table 1:

719 Weather data over the course of the experiment period. Data were recorded by two HOBO  
720 Micro Station data loggers located on FARF at 30-minute intervals.

721

### 722 Supplementary Table 2:

723 ADD data during collection of the bone samples and samples taken for proteomics.

724

### 725 Supplementary Data 1:

726 List of 133 Quantifiable proteins extracted from Progenesis and their localisation and binding  
727 site according to Uniprot.

728

### 729 Supplementary Data 2:

730 Top 20 enriched GO terms for Biological Process (first sheet), Molecular Function (second  
731 sheet) and Cellular Component (third sheet) of the proteins extracted from all the samples.

732

### 733 Supplementary Data 3:

734 List of proteins identified in the four bone types (iliac fresh and skeletonized, tibia fresh and  
735 skeletonized).

736

### 737 Supplementary Data 4:

738 Relative abundances of proteins extracted from all samples only and grouped by bone type  
739 (iliac fresh, tibia fresh, iliac skeletonized, tibia skeletonized).

740

### 741 Supplementary Data 5:

742 List of proteins more abundant in iliac fresh samples than in iliac skeletonized samples (first  
743 sheet) and more abundant in tibia fresh samples than in tibia skeletonized samples (second  
744 sheet).

745

### 746 Supplementary Data 6:

747 Relative abundances of proteins extracted from fresh samples only and grouped by donor  
748 (D1, D2, D3, D4).

749

### 750 Supplementary Data 7:

751 Relative abundances of proteins extracted from skeletonized samples only and grouped by  
752 deposition type (open pit vs. shallow burial).
